# Supplementary material
Source: PubMed Central journal article supplement (PMC3118510)

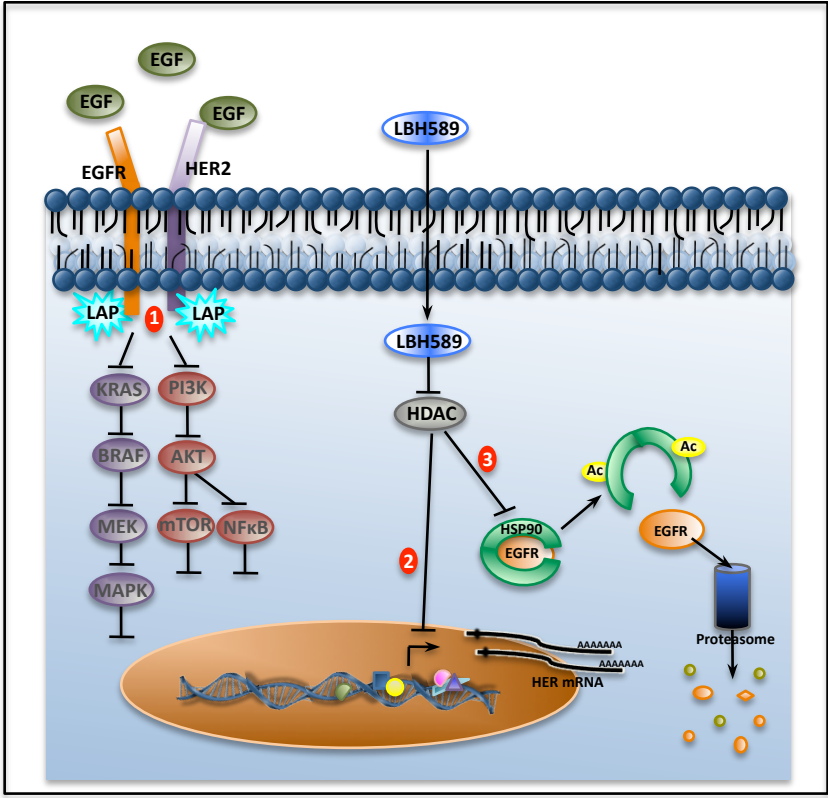

Supplement: NIHMS284274-supplement-5.pdf [file NIHMS284274-supplement-5.pdf]
